# Supplementary material
Source: PubMed Central journal article supplement (PMC6897354)
Supplement: NIHMS1060145-supplement-Suppl.pdf [file NIHMS1060145-supplement-Suppl.pdf]

**Supplementary Table 1. Primers Used in This Study.**

| <b>Primer name</b>  | <b>Sequence 5'-3'</b>     |
|---------------------|---------------------------|
| p65-Q-F             | ATGTGGAGATCATTGAGCAGC     |
| p65-Q-R             | CCTGGTCCTGTGTAGCCATT      |
| HIF-1 $\alpha$ -Q-F | GAACGTCGAAAAGAAAAGTCTCG   |
| HIF-1 $\alpha$ -Q-R | CCTTATCAAGATGCGAACTCACA   |
| IRS1-Q-F            | ACAAACGCTTCTTCGTA CTGC    |
| IRS1-Q-R            | AGTCAGCCCGCTTGTTGATG      |
| p70S6K1-Q-F         | TTTGAGCTACTTCGGGTA CTTGG  |
| p70S6K1-Q-R         | CGATGAAGGGATGCTTTACTTCC   |
| IL-6-Q-F            | ACTCACCTCTTCAGAACGAATTG   |
| IL-6-Q-R            | CCATCTTTGGAAGGTTTCAGGTTG  |
| GADPH-Q-F           | ATGGGTGTGAACCATGAGAAGTATG |
| GADPH-Q-R           | GGTGCAGGAGGCATTGCT        |
